# Supplementary material for: Nanobiocatalysts with inbuilt cofactor recycling for oxidoreductase catalysis in organic solvents
Source: Royal Society of Chemistry journal article supplement (doi:10.1039/d3na00413a), 2023-01-01
Supplement: d3na00413a1.pdf [file d3na00413a1.pdf]

## Supporting Information

# Nanobiocatalysts for cofactor-independent oxidoreductase catalysis in organic solvents

Jenny A. Sahlin, Congyu Wu, Andrea Buscemi, Claude Schärer, Seyed Amirabbas Nazemi, Rejaul SK, Nataly Herrera-Reinoza, Thomas A. Jung and Patrick Shahgaldian

Keywords: nanobiocatalysts • co-factor recycling • organic solvent • oxidoreductase • continuous flow

### Table of Contents

|                                                             |   |
|-------------------------------------------------------------|---|
| Supporting Figures .....                                    | 2 |
| Figure S1. Thermogravimetric analyses of MSNs .....         | 2 |
| Figure S2. Nitrogen adsorption-desorption experiments ..... | 3 |
| Figure S3. XPS measurements .....                           | 4 |
| References .....                                            | 5 |

## Supporting Figures

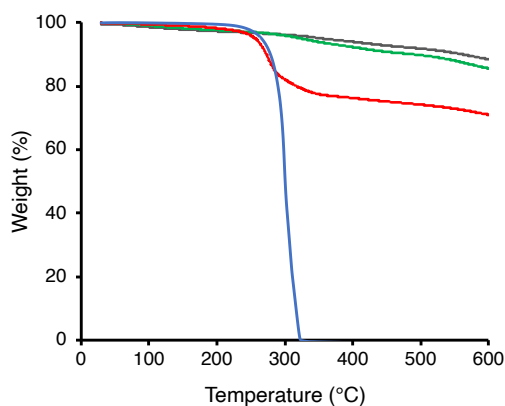

**Figure S1. Thermogravimetric analyses of MSNs** - measurements were carried out on MSNs before (green) and after work-up (green); control experiments were also carried out with neat CTAC (blue) and a physical mixture of CTAC and MSNs (red). CTAC displayed a consistent weight loss starting at *ca.* 255 °C (also in the mixture with MSNs); this loss can be safely attributed to molecular decomposition. No such mass loss is observed for MSNs in the range 200-300 °C (both before and after work-up) suggesting the absence of relevant quantities of CTAC in the MSNs. A slight weight loss is measured at temperatures above 350 °C; this can be safely attributed to the condensation and release of surface -OH functions from the silica surface.

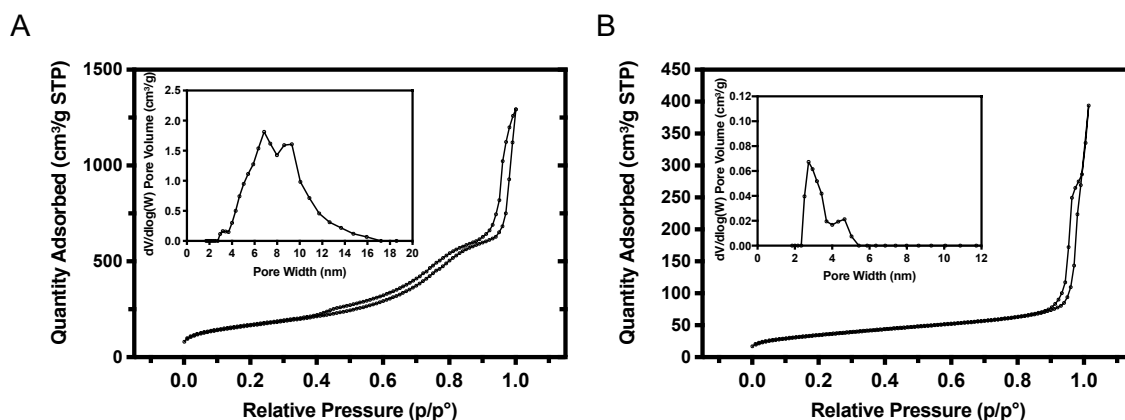

**Figure S2. Nitrogen adsorption-desorption experiments** - [A] core silica nanoparticles: the BET surface area was measured at  $214 \text{ m}^2/\text{g}$ , and the total pore volume was  $0.87 \text{ cm}^3/\text{g}$ . A capillary condensation step and hysteresis loop can be observed at the relative pressure around  $0.4 < P/P_0 < 1.0$  in the  $\text{N}_2$  sorption isotherm. Based on the density functional theory (DFT) method, the pore size distribution displays a complex shape centred on *ca.* 8 nm, as shown in the figure inset. While indicative of the pore size, this value needs to be considered carefully as the pores display a conical geometry. [B] MSNs: the BET surface area was measured at  $120.8 \text{ m}^2/\text{g}$ , and the total pore volume was  $0.43 \text{ cm}^3/\text{g}$ . A capillary condensation step and hysteresis loop can be observed at the relative pressure around  $0.2 < P/P_0 < 1$  in the  $\text{N}_2$  sorption isotherm. The pore size distribution is shown in the figure inset; it shows a bimodal distribution with two mean values of *ca.* 3 and 5 nm. The close connectivity and continuous pore channels between the first generation and the second generation are consistent with the results reported previously.<sup>1</sup> Measurements were carried out on MSNs before (green) and after the work-up (green); control experiments were also carried out with neat CTAC (blue) and a physical mixture of CTAC and MSNs (red). CTAC displayed a consistent weight loss starting at *ca.*  $255 \text{ }^\circ\text{C}$  (also in the mixture with MSNs); this loss can be safely attributed to molecular decomposition.

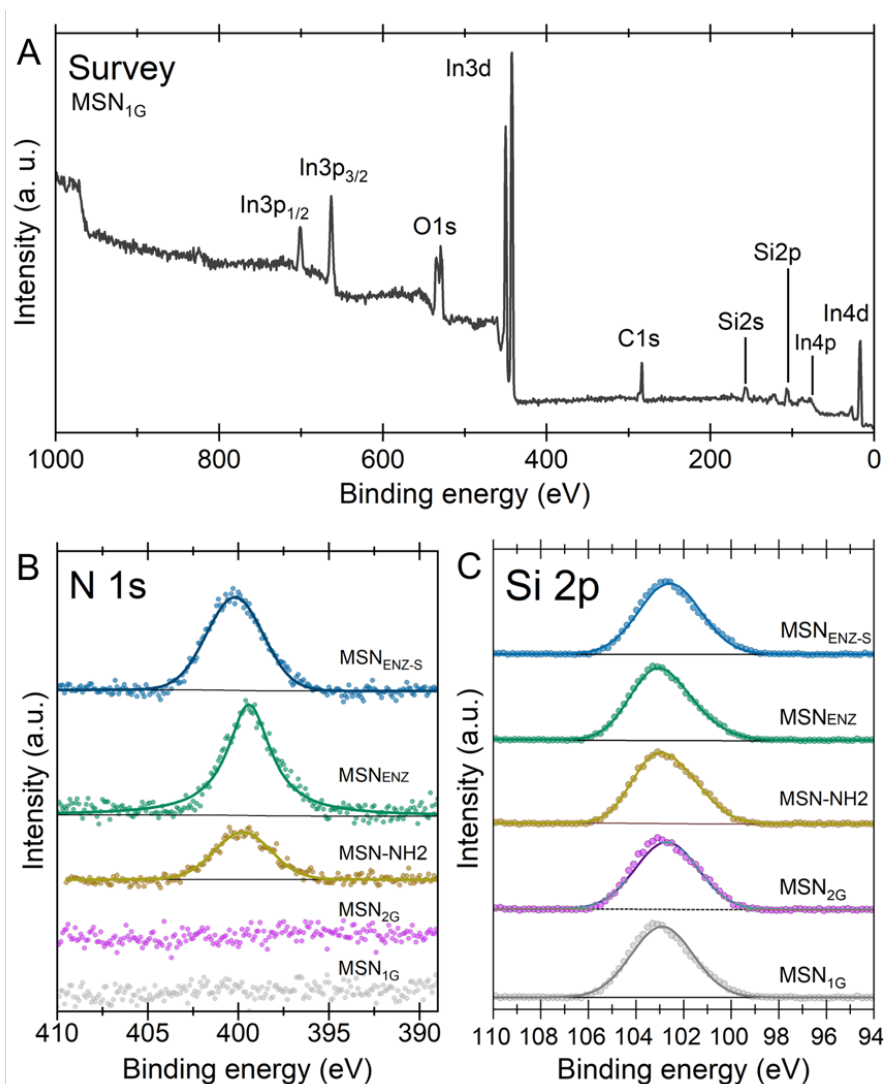

**Figure S3. XPS measurements** - Full survey XP spectra of MSN<sub>1G</sub> (A); high-resolution spectrum of N1s (B) and Si2p taken at different stages of assembly of the core-shell MSN (C). Colour code: from the bottom to the top: MSN<sub>1G</sub> (grey), MSN<sub>2G</sub> (purple), amino-modified MSN<sub>2G</sub> (yellow), MSN<sub>ENZ</sub> (green) and MSN<sub>ENZ-S</sub> (blue). Due to the insulating nature of the core-shell nanoparticles, all measurements have been performed using a flood gun to compensate for the charging effect.<sup>2</sup>

## References

1. D. Shen, J. Yang, X. Li, L. Zhou, R. Zhang, W. Li, L. Chen, R. Wang, F. Zhang and D. Zhao, *Nano Lett.*, 2014, **14**, 923-932.
2. D. R. Baer, M. H. Engelhard, D. J. Gaspar, A. S. Lea and C. F. Windisch Jr., *Surface and Interface Analysis*, 2002, **33**, 781-790.
